# Supplementary material
Source: PubMed Central journal article supplement (PMC4919255)
Supplement: NIHMS745921-supplement-Supp_Fig_S1.pdf [file NIHMS745921-supplement-Supp_Fig_S1.pdf]

## Supplementary Figure 1

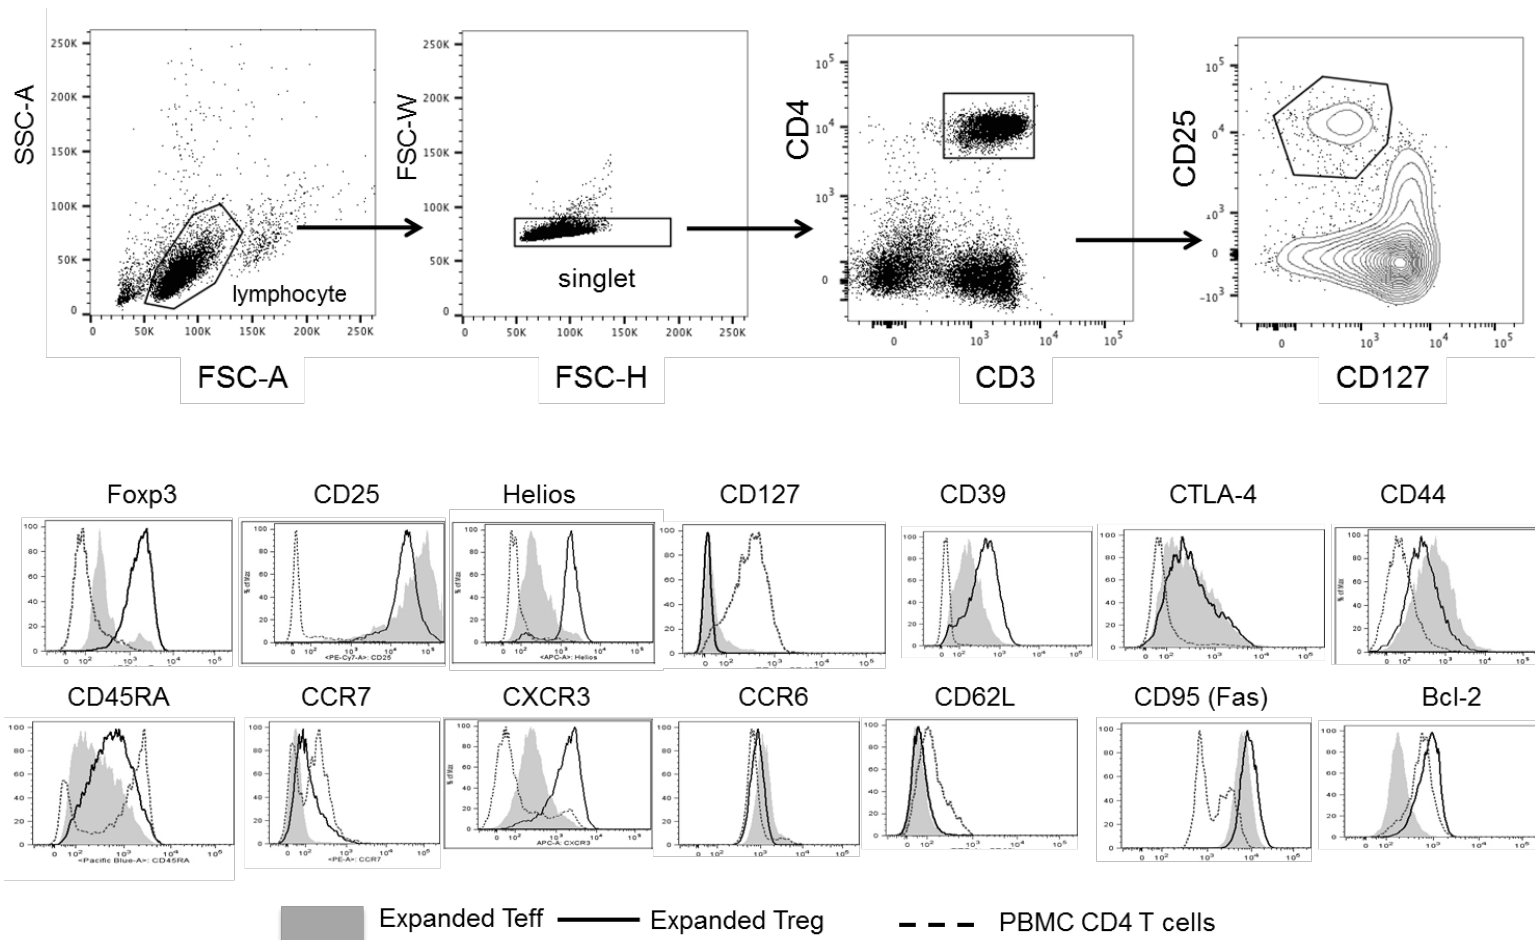

Gating for flow sorting of Treg and phenotype of the ex-vivo expanded infused Treg. Lymphocytes were gated based on forward (FSC) and side-scattered light (SSC), followed by single cell and CD4<sup>+</sup> T cell gating. Treg were gated on CD25<sup>+</sup>CD127<sup>lo</sup> from CD4<sup>+</sup> T lymphocytes (Top). Expanded Treg and Teff were stained for FcγR3, CD25, Helios, CD127, CD39, CTLA-4, CD44, CD45RA, CCR7, CXCR3, CCR6, CD62L, CD95 and Bcl-2. CD4<sup>+</sup> PBMC T cells were used as controls. Data are representative of 4 experiments (bottom).
