# Supplementary material
Source: PubMed Central journal article supplement (PMC4919255)
Supplement: NIHMS745921-supplement-Supp_Table_S1-S2.pdf [file NIHMS745921-supplement-Supp_Table_S1-S2.pdf]

**Supplemental Table S1. MHC typing of heart allograft donors and recipients**

| Tx # | ID          |           | Mafa-A<br>Haplotype 1 | Mafa-A<br>Haplotype 2 | Mafa-B<br>Haplotype 1 | Mafa-B<br>Haplotype 2 | Mafa-DRB<br>Haplotype 1 | Mafa-DRB<br>Haplotype 2 | Haplotype Sharing                                |
|------|-------------|-----------|-----------------------|-----------------------|-----------------------|-----------------------|-------------------------|-------------------------|--------------------------------------------------|
| 1    | <b>M117</b> | Recipient | A067                  | A006_A010             | B048                  | B056a                 | DR02                    | DR05                    | haplo match Mafa-A & DR                          |
|      | <b>M121</b> | Donor     | A067                  | A101                  | B090                  | B016                  | DR22                    | DR05                    |                                                  |
| 2    | <b>M116</b> | Recipient | A058                  | A063                  | B083b                 | B104                  | DR13                    | DR09b                   |                                                  |
|      | <b>M125</b> | Donor     | A010                  | A008                  | B008a                 | B154                  | DR02                    | DR03a                   |                                                  |
| 3    | <b>M123</b> | Recipient | A088                  | A101                  | B028a                 | B101b                 | DR07                    | DR03a                   | haplo match Mafa-A &<br>partial Mafa-B & Mafa-DR |
|      | <b>M124</b> | Donor     | A077                  | A101                  | B016                  | B101a                 | DR05                    | DR11                    |                                                  |
| 4    | <b>M127</b> | Recipient | A007                  | A010                  | B002                  | B008a                 | DR02                    | DR10                    | haplo match Mafa-B                               |
|      | <b>M129</b> | Donor     | A067                  | A068                  | B090                  | B008a                 | DR22                    | DR03b                   |                                                  |
| 5    | <b>M122</b> | Recipient | A067                  | A067                  | B090                  | B048                  | DR22                    | DR02                    |                                                  |
|      | <b>M128</b> | Donor     | A007                  | A088                  | B008b                 | B184                  | DR13                    | DR04                    |                                                  |
| 6    | <b>M124</b> | Recipient | A038                  | A088                  | B024                  | B090b                 | DR01                    | DR09a                   | MHC haploidentical                               |
|      | <b>M130</b> | Donor     | A010                  | A088                  | B008a                 | B090b                 | DR02                    | DR09a                   |                                                  |
| 7    | <b>M125</b> | Recipient | A007                  | A010                  | B008b                 | B056b                 | DR04                    | DR05                    |                                                  |
|      | <b>M126</b> | Donor     | A019                  | A043                  | B090                  | B004a                 | DR06                    | DR01                    |                                                  |
| 8    | <b>M118</b> | Recipient | A007                  | A066                  | B008b                 | B056a'                | DR04                    | DR21                    |                                                  |
|      | <b>M116</b> | Donor     | A101b                 | A004                  | B004a                 | B056c                 | DR15                    | DR13                    |                                                  |
| 9    | <b>M120</b> | Recipient | A101b                 | A060                  | B004a                 | B101d                 | DR15                    | DR01                    |                                                  |
|      | <b>M122</b> | Donor     | A004                  | A006                  | B036b                 | B002                  | DR08                    | DR03a                   |                                                  |

**Supplemental Table S2. Grading of heart allograft rejection**

| <b>Tx#</b> | <b>Group</b>  | <b>Recipient</b> | <b>Inflammation Pattern</b> | <b>Confluent necrotic foci</b> | <b>Arteritis</b> | <b>Nodular B cell aggregates</b> | <b>ISHLT 2004</b> | <b>ISHLT 1990</b> |
|------------|---------------|------------------|-----------------------------|--------------------------------|------------------|----------------------------------|-------------------|-------------------|
| 1          | Control       | M117             | diffuse moderate            | 0                              | ++               | +                                | 3R                | 3B                |
| 2          |               | M116             | diffuse moderate            | +                              | ++               | +                                | 3R                | 3B                |
| 3          |               | M123             | diffuse severe              | ++                             | ++               | +                                | 3R                | 4                 |
| 4          | Treg infusion | M127             | diffuse moderate            | +                              | +                | +/-                              | 3R                | 3B                |
| 5          |               | M122             | diffuse severe              | +                              | ++               | ++                               | 3R                | 4                 |
| 6          |               | M124             | diffuse moderate            | +++                            | +++              | +                                | 3R                | 4                 |
| 7          |               | M125             | diffuse moderate            | +                              | +++              | +                                | 3R                | 4                 |
| 8          |               | M118             | diffuse severe              | ++                             | +++              | +/-                              | 3R                | 4                 |
| 9          |               | M120             | diffuse moderate            | +++                            | +++              | +/-                              | 3R                | 4                 |

0 = absent; +/- = minimal; + = mild/few; ++ = moderate; +++ = severe
